# Supplementary material for: Efficient electrocatalytic nitrogen oxidation to nitrate by the self-assembly of supramolecular cucurbit[6]uril with a heteropolyacid
Source: Royal Society of Chemistry journal article supplement (doi:10.1039/d3qi02278a), 2023-12-21
Supplement: d3qi02278a1.pdf [file d3qi02278a1.pdf]

## **Efficient electrocatalytic nitrogen oxidation to nitrate over the self-assembly of supramolecular cucurbit[6]uril with heteropolyacid**

Manli Xu<sup>a</sup>, Xianyan Ao<sup>a</sup>, Chengcheng Son<sup>b</sup>, Liling Zeng<sup>a</sup>, Chao Zhang<sup>a</sup>, Yunqian Zhang<sup>\*a</sup>, Wenfen Zhao<sup>\*b</sup>

<sup>a</sup> Key Laboratory of Macrocyclic and Supramolecular Chemistry of Guizhou Province, Guizhou University, Guiyang 550025, People's Republic of China

<sup>b</sup> School of Chemistry and Chemical Engineering, Guizhou University, Guiyang 550025, China

Corresponding Author: E-mail: sci.yqzhang@gzu.edu.cn, zhaowf@gzu.edu.cn

## Experimental

5% Nafion, phosphomolybdic acid (PMA), Na<sub>2</sub>SO<sub>4</sub>, Graphitic carbon, isopropanol (C<sub>3</sub>H<sub>8</sub>O), H<sub>2</sub>SO<sub>4</sub>, and NaOH were purchased from Aladdin Bio-Chem Technology Co., LTD (Shanghai, China). And were used without purification. Pure water was used for all experiments. The Cucurbit[6]uril (Q[6]) was prepared according to reference.<sup>1</sup> Ar (≥ 99.999%), and N<sub>2</sub> (≥ 99.999%) were purchased from Guizhou Sanhe Yongxin Trading Co., LTD.

## Preparation of Q[6]-PMA

Dissolved 50 mg of Q[6] in 50 mL of 3 M HCl solution. PMA was weighed in a molar ratio of 1:1 concerning Q[6], and dissolved in 50 mL of pure water. The PMA solution was added to the Q[6] solution at room temperature using a constant pressure funnel with a controlled drop rate of 10 drops per minute. A green precipitate was obtained, washed with pure water, and dried in a vacuum at 40 °C to obtain Q[6]-PMA with a yield of 86.7%.

Potassium phosphomolybdate (PMK): Under ambient conditions, 100 mL of 0.21 M KCl aqueous solution was added drop wise into 0.034 M 200 mL of PMA aqueous solution to obtain a yellow precipitate, which was washed with pure water and dried at 80 °C.

## Characterization

The XPS data was obtained via Thermo Scientific ESCALAB Xi. SEM (JSM-7610FPlus), TEM (HT7800), and EDX were used to analyze the morphology of the samples. Raman tests were performed at 785 nm, FTIR (BRUKER Alpha) in the range 400 cm<sup>-1</sup>– 4000 cm<sup>-1</sup>, and the XRD data were collected at Ultima IV (Cu Ka 1.54 Å). Thermogravimetric Differential Scanning Calorimetry (TG-DSC) was tested using STA2500 in the N<sub>2</sub> atmosphere. Nitrogen adsorption and desorption isotherms were tested using ASAP 2460 at 77 K (samples were prepared using vacuum degassing at 110°C for 6 hours before testing). EA (Elementar vario EL cube) was used to determine the organic element content. ICP-OES (ICAP-7000) was tested for P and Mo. Nitrate absorbance was tested using UV-2700. Standard NO<sub>3</sub><sup>-</sup> and NO<sub>2</sub><sup>-</sup> infrared data were tested by ATR-FTIR (IRTracer 100).

## Electrochemical measurement

Electrochemical measurements were performed using CHI 760E electrochemical analyzer (CH Instruments, Inc., Shanghai). A leak-free Ag/AgCl, platinum sheet, and glassy carbon electrodes (GCE) were used as reference, auxiliary, and working electrodes, respectively. Hermetically sealed single-chamber electrolytic cells were used as electrolytic cells. All electrochemical tests were carried out in pH 6.8 0.1 M Na<sub>2</sub>SO<sub>4</sub> solution at ambient conditions, and the working potentials were converted to reversible hydrogen electrodes (RHEs) in data processing.

$$E_{(\text{vs. RHE})} = E_{(\text{Ag/AgCl})} + 0.197 + 0.059 \times \text{pH} \quad (1)$$

Modified electrode preparation: 2.5 mg of Q[6]-PMA was added to 200 μL of pure

water, 200  $\mu\text{L}$  of isopropanol, 20  $\mu\text{L}$  of Nafion, 1.0 mg of graphitic carbon, sonicated for half an hour, and 3.0  $\mu\text{L}$  drops were taken to the GCE.

Add 20 mL of 0.1 M  $\text{Na}_2\text{SO}_4$  solution to a sealed electrolytic cell. The  $\text{N}_2$  flow rate was 15  $\text{mL min}^{-1}$  and was purified with 0.05 M  $\text{H}_2\text{SO}_4$  before entering a sealed electrolytic cell.

### Determination of nitrate

The concentration-absorbance curve was calibrated with a series of standard potassium nitrate solutions, and a concentration-peak area standard curve was established using ion chromatography (ICS-1100).

Take 5 mL of electrolyte solution and add 0.1 mL of 1M HCl and 0.01 mL of 0.8 wt % sulfanilic acid solution. The absorption spectra were measured with UV-vis, and the absorption intensities at 220 nm and 275 nm wavelengths were recorded. The calculation formula for final absorbance:

$$A = A_{220\text{nm}} - 2A_{275\text{nm}} \quad (2)$$

Nitrate yield

$$R_{\text{NO}_3^-} = \frac{C_{\text{NO}_3^-} \times V}{t \times m_{\text{cat}}} \quad (3)$$

Nitrate Faraday efficiency

$$\text{FE} = \frac{5 \times F \times C_{\text{NO}_3^-} \times V}{Q} \quad (4)$$

R is the yield of  $\text{NO}_3^-$ , C is the measured  $\text{NO}_3^-$  concentration ( $\mu\text{g mL}^{-1}$ ), V is the total volume of electrolyte (mL), t is the time of electrocatalysis (h), and  $m_{\text{cat}}$  is the weight of loaded catalyst (mg). F is the Faraday constant, and Q is the total charge through the working electrode.

### TOF calculation method

$$\text{TOF} = \frac{\text{The converted amount of nitrogen}}{\text{Number of active sites} \times \text{Time}}$$

The converted amount of nitrogen is approximate to molar amount of  $\text{NO}_3^-$  (mol); the number of active sites was calculated by the Mo content in ICP; time is the CA test time (h).

### In situ FTIR testing

Prior to testing, the purified  $\text{N}_2$  was passed continuously for 30 min into a Spectroelectrochemical cell containing 0.1 M  $\text{Na}_2\text{SO}_4$  solution at a flow rate of 15  $\text{mL min}^{-1}$ . Then, a background spectrum was collected and used for the 2.2 V vs. RHE CA test. Simultaneously, in situ, ATR-FTIR measurements were synchronously triggered at a resolution of 4  $\text{cm}^{-1}$ , and the corresponding spectra were recorded by the software. In situ electrochemical FTIR under argon condition is carried out under the same conditions.

### Isotopic labeling experiments

Isotopic labeling electrochemical NOR experiments were performed using  $^{15}\text{N}_2$  as raw material to instead of standard  $^{14}\text{N}_2$ . Before conducting the electrochemical test, the electrolyte was purged with  $^{15}\text{N}_2$  for 10 min, and then the NOR test was performed at 2.2 V vs. RHE for 4 h. Subsequently, the electrolyte was concentrated to 2 mL and then analyzed via isotope-ratio mass spectrometry (Delta V Advantage).

### Quantum chemical computing

All calculations were done in the Gaussian 09.<sup>2</sup> Constructed initial geometries of supramolecular complexes based on X-ray crystal structures,<sup>3</sup> according to density functional theory M06L theoretical method. The metal Mo atom used the LANL2DZ group, and all-electron 6-311G (d,p) groups were used for the other atoms. Boys and Bernardi functions were used to correct the binding energy of supramolecular interactions using basis set superposition error (BSSE).

### Supplementary Figures

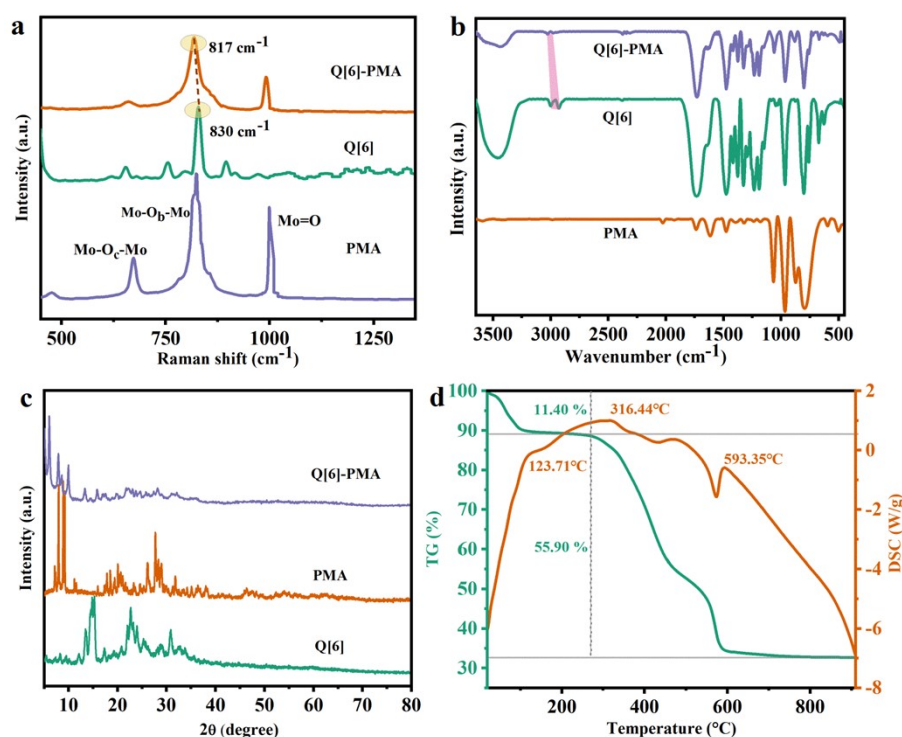

**Fig. S1** Characterization of Q[6]-PMA (a) Raman, (b) FTIR, (c) XRD, and (d) TG-DSC.

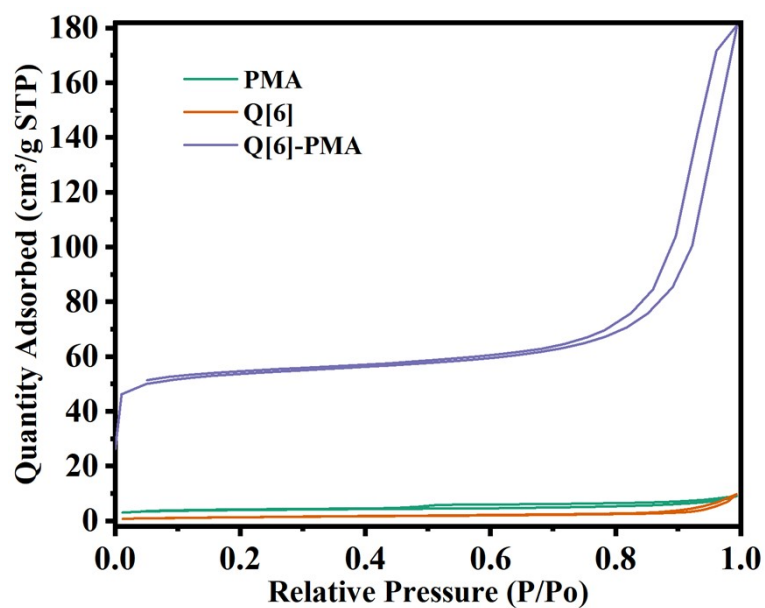

Fig. S2 N<sub>2</sub> adsorption and desorption curve of Q[6]-PMA.

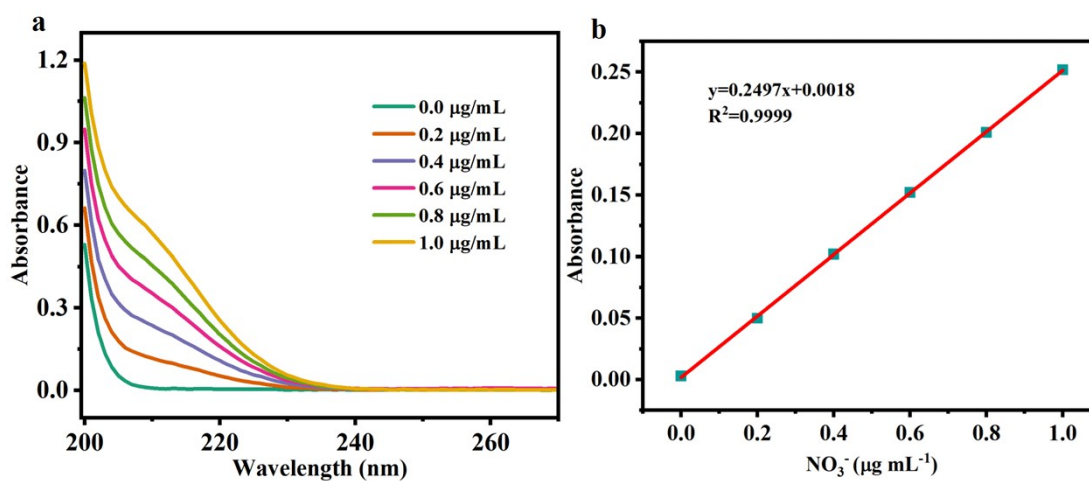

Fig. S3 (a) Standard NO<sub>3</sub><sup>-</sup> UV-vis spectrum, (b) NO<sub>3</sub><sup>-</sup> calibration curve.

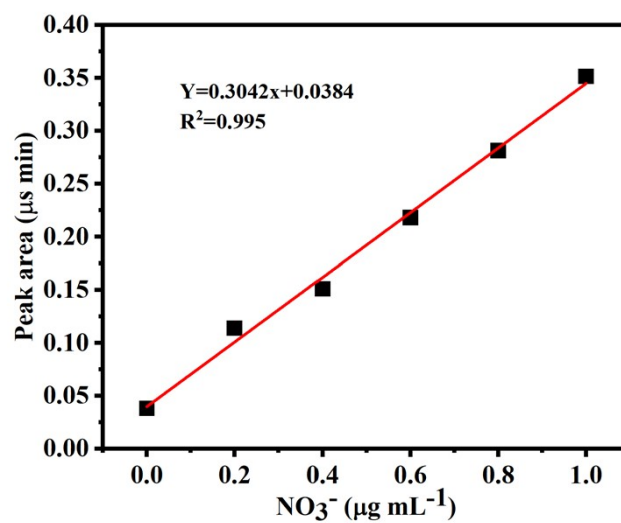

**Fig. S4** Calibration curves for  $\text{NO}_3^-$  ion chromatography (IC).

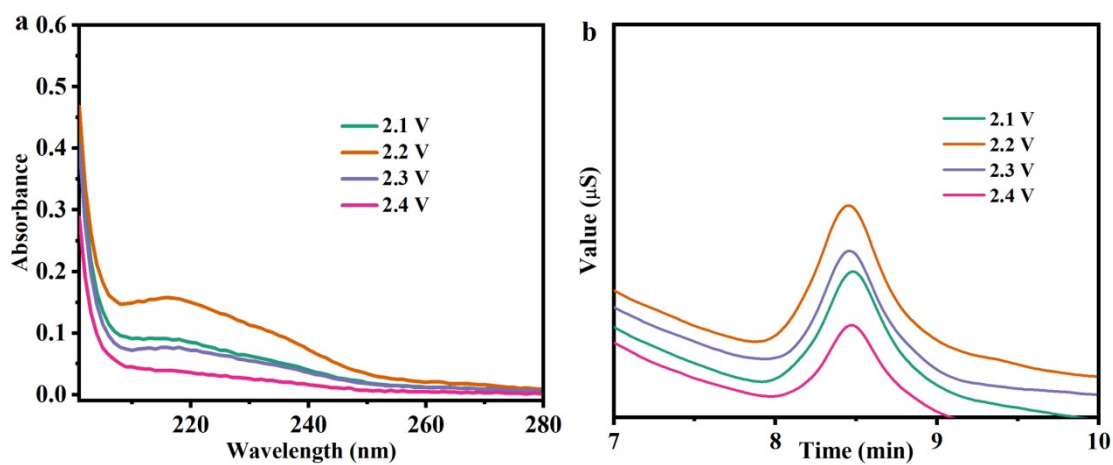

**Fig. S5**  $\text{NO}_3^-$  detection of Q[6]-PMA electrocatalytic NOR at different potentials: (a) Uv-vis and (b) IC.

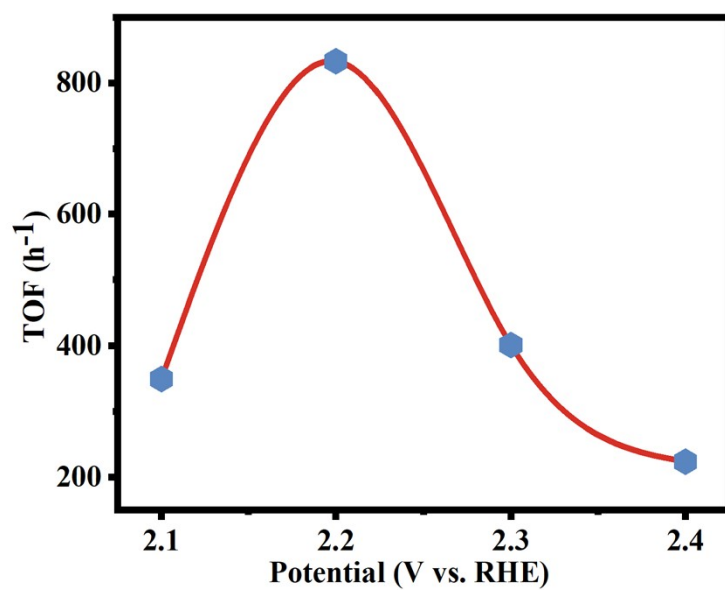

**Fig. S6** TOF values of Q[6]-PMA in 0.1 M  $\text{Na}_2\text{SO}_4$  solution at different potentials.

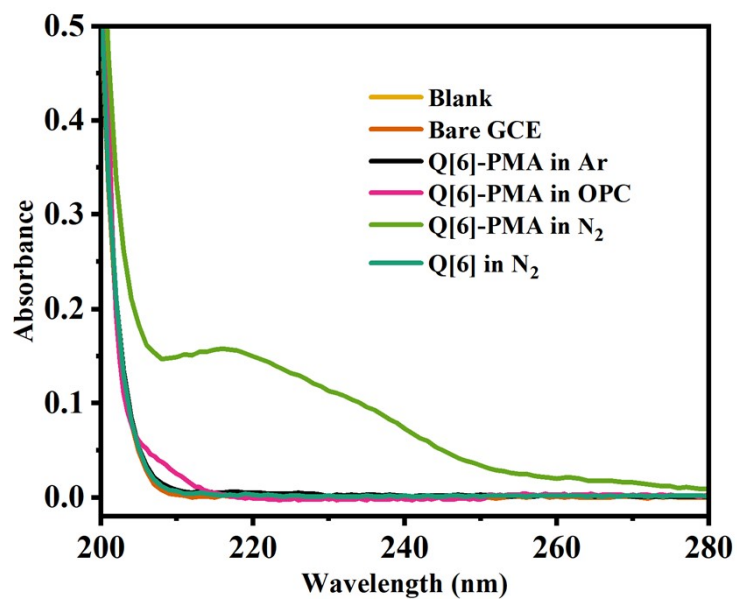

**Fig. S7** Uv-vis spectra of blank electrolyte, Q[6] and Q[6]-PMA at  $N_2$  saturated electrolyte, and Q[6]-PMA at Ar saturated electrolyte conditions at an open circuit voltage of 2.2 V vs. RHE.

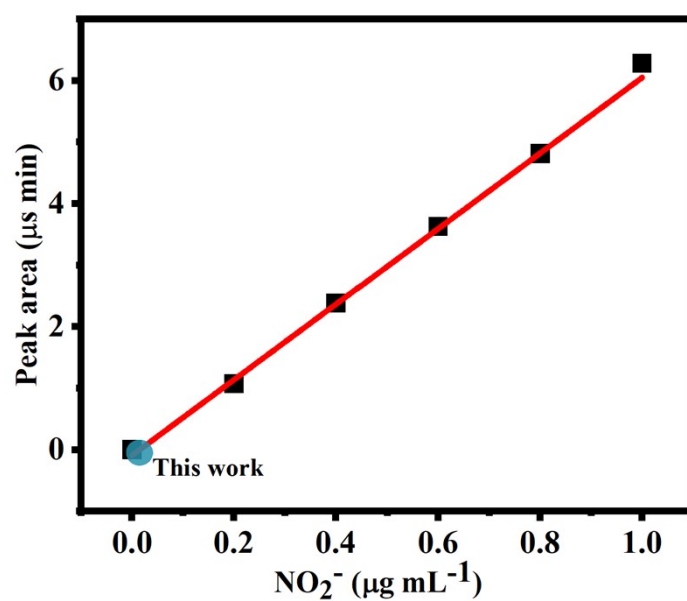

**Fig. S8** Calibration curves for  $NO_2^-$  ion chromatography (IC).

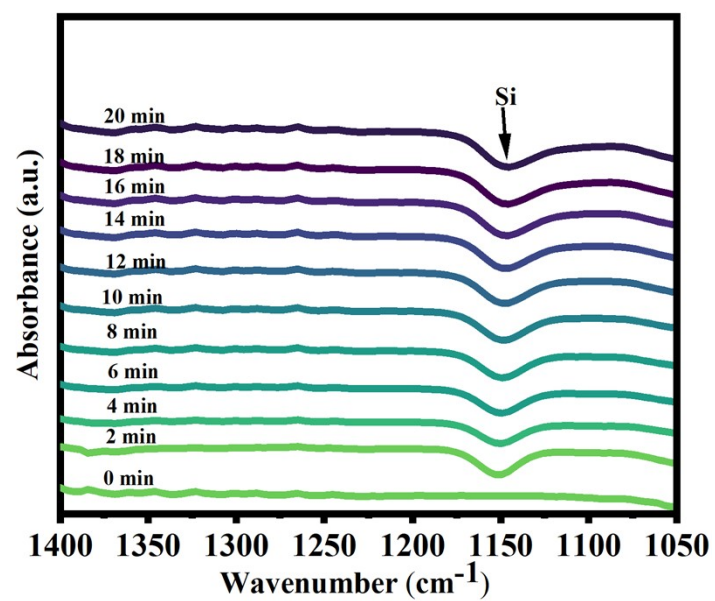

**Fig. S9** Electrochemistry in situ FTIR of Q[6]-PMA under argon.

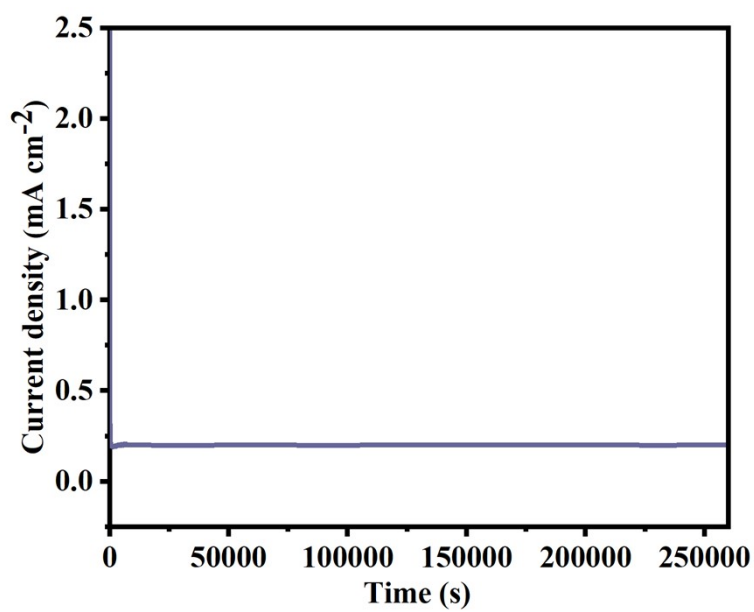

**Fig. S10** Q[6]-PMA electrocatalytic NOR performance, 72-hour CA test at 2.2 V vs. RHE.



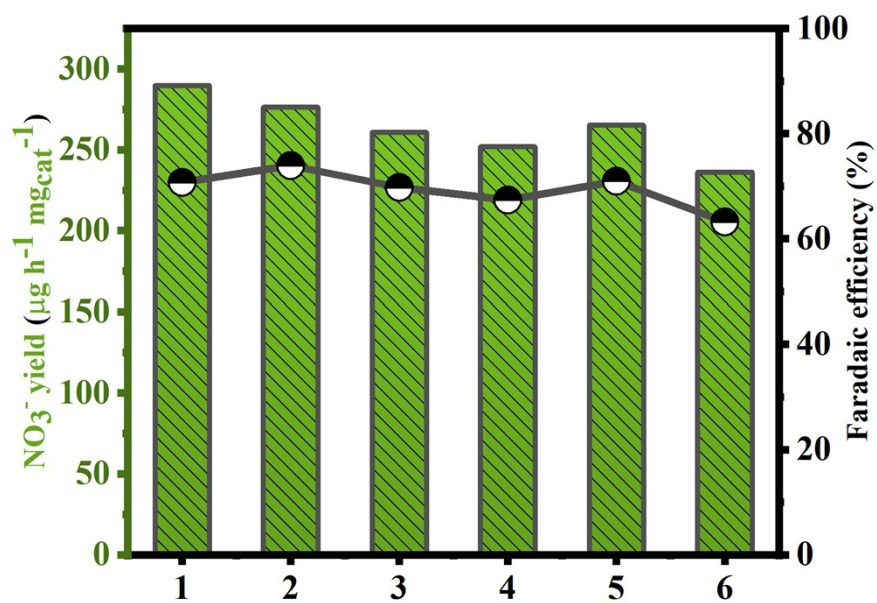

Fig. S11  $\text{NO}_3^-$  yield and FE in 6 cycles of Q[6]-PMA electrocatalytic NOR.

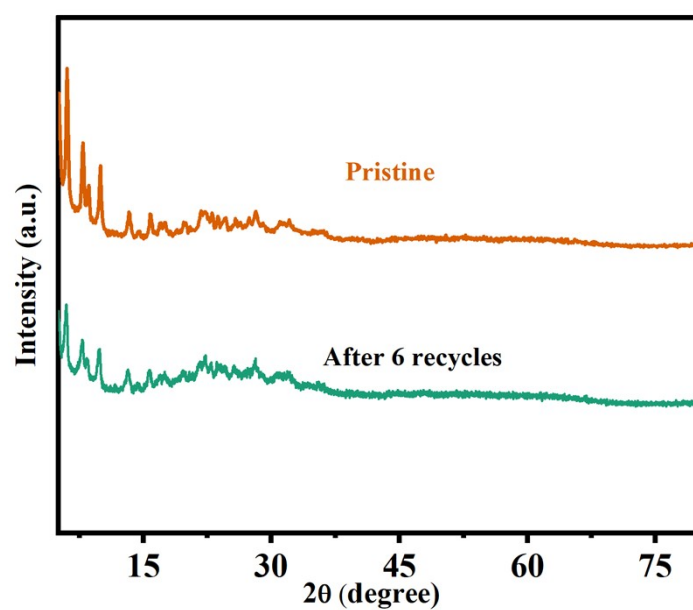

Fig. S12 XRD patterns of Q[6]-PMA pristine, after 6 recycles.

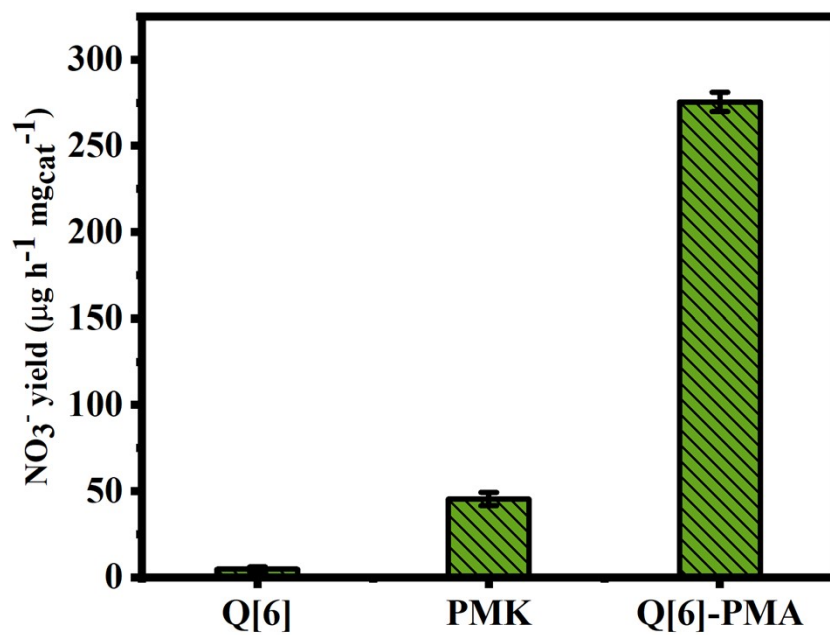

Fig. S13  $\text{NO}_3^-$  yield of Q[6], PMK, and Q[6]-PMA at 2.2 V vs. RHE.

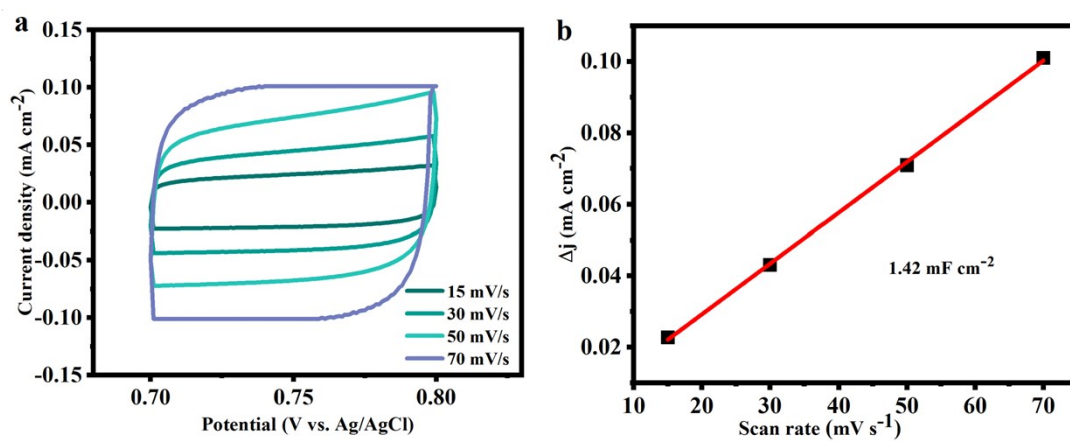

Fig. S14 (a) CV of Q[6]-PMA at different scanning speeds, (b) the function between current density and scanning rate in the CV curve.

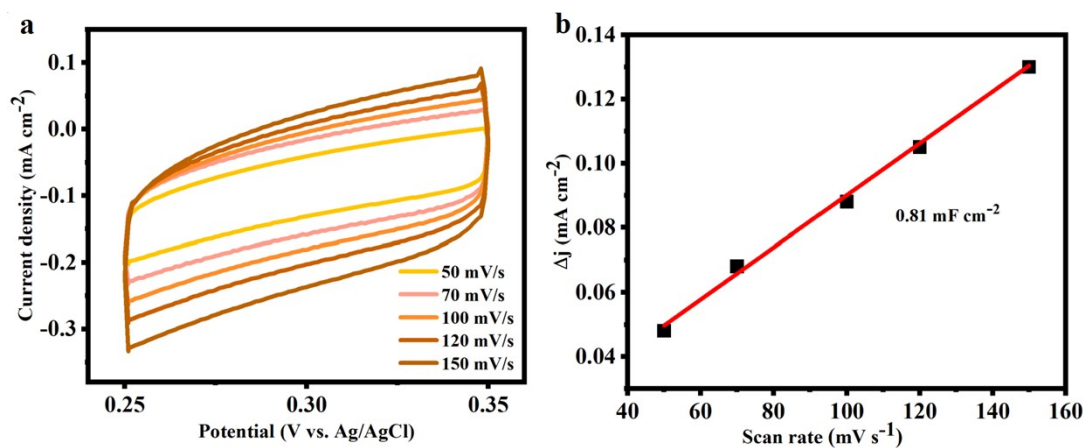

**Fig. S15** (a) CV of Q[6] at different scanning speeds, (b) the function between current density and scanning rate in the CV curve.

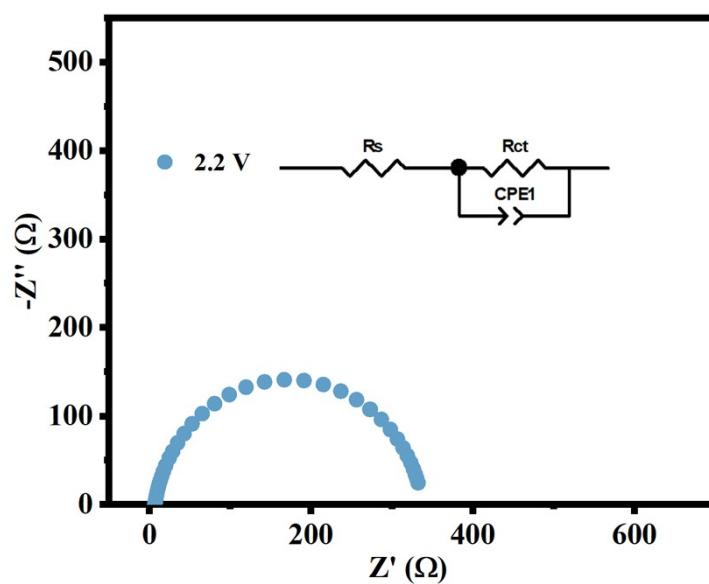

**Fig. S16** In  $N_2$  saturation of 0.1 M  $Na_2SO_4$  solution, Q[6]-PMA under 2.2 V vs. RHE of NOR of impedance spectroscopy.

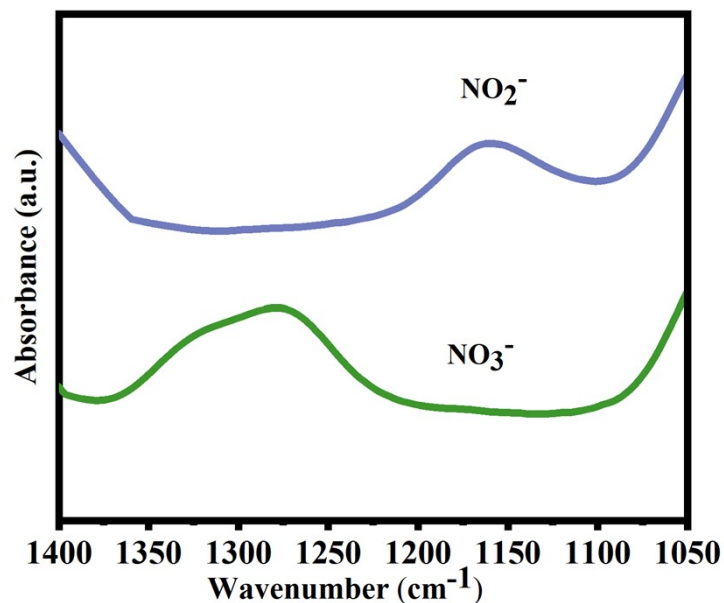

**Fig. S17** Spectra of standard  $\text{NO}_3^-$  and  $\text{NO}_2^-$  detected by ATR-IR in 0.1M  $\text{Na}_2\text{SO}_4$  solution.

**Table S1.** EA and ICP determination of Q [6]-PMA Element Content.

| EA |         | ICP |        |
|----|---------|-----|--------|
| C% | 18.821% | Mo% | 20.47% |
| N% | 14.615% | P%  | 0.72%  |
| O% | 35.605% |     |        |

**Table S2.** Q[6], PMA, and Q[6]-PMA nitrogen adsorption–desorption isotherm.

| Electrode Material | BET Surface Area           | micropore volume            | pore size  |
|--------------------|----------------------------|-----------------------------|------------|
| Q[6]               | 5.2066 m <sup>2</sup> /g   | 0.000683 cm <sup>3</sup> /g | 13.6043 nm |
| PMA                | 14.0674 m <sup>2</sup> /g  | 0.004626 cm <sup>3</sup> /g | 6.6465 nm  |
| Q[6]-PMA           | 167.1707 m <sup>2</sup> /g | 0.066453 cm <sup>3</sup> /g | 20.5522 nm |

**Table S3.** Optimal  $\text{NO}_3^-$  yield and Faradaic efficiency (FE) of different electrolytes under ambient conditions.

| Catalyst                            | electrolyte                    | Potential<br>(V vs. RHE) | $\text{NO}_3^-$ yield rate                              | FE(%) | Ref.     |
|-------------------------------------|--------------------------------|--------------------------|---------------------------------------------------------|-------|----------|
| Q[6]-PMA                            | 0.1 M $\text{Na}_2\text{SO}_4$ | 2.2                      | 276.33 $\mu\text{g h}^{-1} \text{mg}_{\text{cat}}^{-1}$ | 73.93 | Our work |
| PCN-222(Fe)                         | 0.1 M HCl                      | 1.6                      | 110.9 $\mu\text{g h}^{-1} \text{mg}_{\text{cat}}^{-1}$  | 70.7  | 4        |
| 5MTO@FTO                            | 0.1 M $\text{K}_2\text{SO}_4$  | 2.1                      | 5.83 $\mu\text{g h}^{-1} \text{mg}_{\text{cat}}^{-1}$   | ~7    | 5        |
| Fe-SnO <sub>2</sub>                 | 0.05 M $\text{H}_2\text{SO}_4$ | 1.96                     | 42.9 $\mu\text{g h}^{-1} \text{mg}_{\text{cat}}^{-1}$   | 0.84  | 6        |
| Au-Nb <sub>2</sub> O <sub>5-x</sub> | 0.1 M $\text{Na}_2\text{SO}_4$ | 2.4                      | 2.29 $\mu\text{g h}^{-1} \text{mg}_{\text{cat}}^{-1}$   | 2.06  | 7        |
| 2.79Ru/TiO <sub>2</sub>             | 0.1 M $\text{Na}_2\text{SO}_4$ | 1.8                      | 161.9 $\mu\text{g h}^{-1} \text{mg}_{\text{cat}}^{-1}$  | 26.1  | 8        |

|                                              |                                          |      |                                                           |       |    |
|----------------------------------------------|------------------------------------------|------|-----------------------------------------------------------|-------|----|
| Pd-s PNSs                                    | 0.1 M KOH                                | 1.75 | 18.56 $\mu\text{g h}^{-1} \text{mg}_{\text{cat}}^{-1}$    | ~1.1  | 9  |
| Pd-MXene                                     | 0.01 M $\text{Na}_2\text{SO}_4$          | /    | 2.80 $\mu\text{g h}^{-1} \text{mg}_{\text{cat}}^{-1}$     | 11.34 | 10 |
| Mo-O-C                                       | 0.1 M $\text{Na}_2\text{SO}_4$           | 2.35 | 217.1 $\mu\text{g h}^{-1} \text{mg}_{\text{cat}}^{-1}$    | 7.8   | 11 |
| Ru- $\text{Mn}_3\text{O}_4$                  | 0.1 M $\text{Na}_2\text{SO}_4$           | 1.6  | 23.28 $\mu\text{g h}^{-1} \text{mg}_{\text{cat}}^{-1}$    | 28.87 | 12 |
| Pt                                           | 0.3 M $\text{K}_2\text{SO}_4$            | 2.19 | 0.060 $\mu\text{mol h}^{-1} \text{cm}^{-2}$               | 1.23  | 13 |
| $\text{Pd}_{0.9}\text{Ru}_{0.1}$             | 0.1 M KOH                                | 1.7  | 0.078 $\mu\text{g h}^{-1} \text{mg}_{\text{cat}}^{-1}$    | 0.61  | 14 |
| Ru NPs                                       | 0.1 M KOH + 0.5 M $\text{SO}_4^{2-}$     | 1.9  | 10.42 $\mu\text{g h}^{-1} \text{mg}_{\text{cat}}^{-1}$    | /     | 15 |
| $\text{ZnFe}_{0.4}\text{Co}_{1.6}\text{O}_4$ | 1 M KOH                                  | 1.5  | 49.8 $\mu\text{g h}^{-1} \text{g}_{\text{Mo}}^{-1}$       | 10.1  | 16 |
| AD-Fe NS                                     | 0.05 M $\text{K}_2\text{SO}_4$           | 2.1  | 2.45 $\mu\text{mol h}^{-1} \text{cm}^{-2}$                | 35.63 | 17 |
| Fe- $\text{TiO}_2/\text{PE}$                 | methanol-water                           | 3.5  | 7055.81 $\mu\text{mol h}^{-1} \text{g}_{\text{cat}}^{-1}$ | ~10   | 18 |
| $\text{B}_{13}\text{C}_2$                    | 0.1 M $\text{Na}_2\text{SO}_4$           | 2.4  | 165.8 $\mu\text{g h}^{-1} \text{mg}_{\text{cat}}^{-1}$    | ~5    | 19 |
| $\text{L-V}_2\text{O}_5\text{NDs}$           | 0.1 M $\text{Na}_2\text{SO}_4$ (pH=10.5) | 2.4  | 1388.0 $\mu\text{g h}^{-1} \text{mg}_{\text{cat}}^{-1}$   | ~1    | 20 |

## References

- 1 R. Behrend, E. Meyer, F. Rusche, Condensation products from glycoluril and formaldehyde. *Justus Liebigs Ann. Chem.*, 1905, **339**, 1-37.
- 2 M.-J. Frisch, G.-W. Trucks, H.-B. Schlegel, G.-E. Scuseria, M.-A. Robb, J.-R. Cheeseman, G. Scalmani, V. Barone, B. Mennucci, G.-A. Petersson, H. Nakatsuji, M. Caricato, X. Li, H.-P. Hratchian, A. F. Izmaylov, J. Bloino, G. Zheng, J.-L. Sonnenberg, M. Hada, M. Ehara, K. Toyota, R. Fukuda, J. Hasegawa, M. Ishida, T. Nakajima, Y. Honda, O. Kitao, H. Nakai, T. Vreven, J.-A. Montgomery, J. E. Jr. Peralta, F. Ogliaro, M. Bearpark, J.-J. Heyd, E. Brothers, K. N. Kudin, V. N. Staroverov, R. Kobayashi, J. Normand, K. Raghavachari, A. Rendell, J. C. Burant, S. S. Iyengar, J. Tomasi, M. Cossi, N. Rega, J. M. Millam, M. Klene, J.-E. Knox, J. B. Cross, V. Bakken, C. Adamo, J. Jaramillo, R. Gomperts, R. E. Stratmann, O. Yazyev, A.-J. Austin, R. Cammi, C. Pomelli, J. W. Ochterski, R. L. Martin, K. Morokuma, V. G. Zakrzewski, G.-A. Voth, P. Salvador, J.-J. Dannenberg, S. Dapprich, A.-D. Daniels, O. Farkas, J.-B. Foresman, J.-V. Ortiz, J. Cioslowski, D.-J. Fox, *Gaussian, Inc.*: Wallingford CT, 2009.
- 3 X.-Y. Jin, J. Zhao, Q.-M. Ge, N. Jiang, M. Liu, H. Cong, Y.-Q. Zhang, Carbon nanomaterials made from supramolecular hybridization of cucurbit[6]uril with phosphomolybdic acid for supercapacitors. *ACS Appl. Nano Mater.*, 2023, **6**, 2459-2471.
- 4 H. He, H.-K. Li, Q.-Q. Zhu, C.-P. Li, Z. Zhang and M. Du, Hydrophobicity modulation on a ferriporphyrin-based metal-organic framework for enhanced ambient electrocatalytic nitrogen fixation, *Appl. Catal. B Environ.*, 2022, **316**, 121673.
- 5 M. Yu, G. Fan, J. Liu, W. Xu, J. Li and F. Cheng, Self-supported Mo-doped  $\text{TiO}_2$  electrode for ambient electrocatalytic nitrogen oxidation, *Electrochimica Acta*, 2022, **435**, 141333.
- 6 L. Zhang, M. Cong, X. Ding, Y. Jin, F. Xu, Y. Wang, L. Chen and L. Zhang, A Janus Fe- $\text{SnO}_2$  catalyst that enables bifunctional electrochemical nitrogen fixation, *Angew. Chem. Int. Ed.*, 2020, **59**, 10888-10893.
- 7 Y. Zhang, F. Du, R. Wang, X. Ling, X. Wang, Q. Shen, Y. Xiong, T. Li, Y. Zhou and Z. Zou, Electrocatalytic fixation of  $\text{N}_2$  into  $\text{NO}_3^-$ : electron transfer between oxygen vacancies and loaded Au in  $\text{Nb}_2\text{O}_{5-x}$  nanobelts to promote ambient nitrogen oxidation, *J. Mater. Chem. A*,

- 2021, **9**, 17442-17450.
- 8 M. Kuang, Y. Wang, W. Fang, H. Tan, M. Chen, J. Yao, C. Liu, J. Xu, K. Zhou and Q. Yan, Efficient nitrate synthesis via ambient nitrogen oxidation with Ru-Doped TiO<sub>2</sub>/ RuO<sub>2</sub> electrocatalysts, *Adv. Mater.*, 2020, **32**, 2002189.
  - 9 S. Han, C. Wang, Y. Wang, Y. Yu and B. Zhang, Electrosynthesis of nitrate via the oxidation of nitrogen on Tensile-Strained Palladium porous nanosheets, *Angew. Chem. Int. Ed.*, 2021, **60**, 4474-4478.
  - 10 W. Fang, C. Du, M. Kuang, M. Chen, W. Huang, H. Ren, J. Xu, A. Feldhoff and Q. Yan, Boosting efficient ambient nitrogen oxidation by a well-dispersed Pd on MXene electrocatalyst, *Chem. Commun.*, 2020, **56**, 5779-5782.
  - 11 S. Zhang, T. Shi, K. Li, Q. Sun, Y. Lin, L. R. Zheng, G. Wang, Y. Zhang, H. Yin and H. Zhang, Ambient electrochemical nitrogen fixation over a bifunctional Mo-(O-C<sub>2</sub>)<sub>4</sub> site catalyst, *J. Phys. Chem. C*, 2022, **126**, 965-973.
  - 12 Z. Nie, L. Zhang, X. Ding, M. Cong, F. Xu, L. Ma, M. Guo, M. Li and L. Zhang, Catalytic kinetics regulation for enhanced electrochemical nitrogen oxidation by Ru-Nanoclusters-Coupled Mn<sub>3</sub>O<sub>4</sub> catalysts decorated with atomically dispersed Ru atoms, *Adv. Mater.*, 2022, **34**, 2108180.
  - 13 Y. Wang, Y. Yu, R. Jia, C. Zhang and B. Zhang, Electrochemical synthesis of nitric acid from air and ammonia through waste utilization, *Nat. Sci. Rev.*, 2019, **6**, 730-738.
  - 14 T. Li, S. Han, C. Wang, Y. Huang, Y. Wang, Y. Yu and B. Zhang, Ru-Doped Pd nanoparticles for nitrogen electrooxidation to nitrate, *ACS Catal.*, 2021, **11**, 14032-14037.
  - 15 T. Li, S. Han, C. Cheng, Y. Wang, X. Du, Y. Yu and B. Zhang, Sulfate-Enabled nitrate synthesis from nitrogen electrooxidation on a Rhodium electrocatalyst, *Angew. Chem. Int. Ed.*, 2022, **61**, e202204541.
  - 16 C. Dai, Y. Sun, G. Chen, A. C. Fisher and Z. J. Xu, Electrochemical oxidation of nitrogen towards direct nitrate production on spinel oxides, *Angew. Chem., Int. Ed.*, 2020, **59**, 9418-9422.
  - 17 Y. Guo, S. Zhang, R. Zhang, D. Wang, D. Zhu, X. Wang, D. Xiao, N. Li, Y. Zhao, Z. Huang, W. Xu, S. Chen, L. Song, J. Fan, Q. Chen and C. Zhi, Electrochemical nitrate production via nitrogen oxidation with atomically dispersed Fe on N-Doped carbon nanosheets, *ACS Nano*, 2021, **16**, 655-663.
  - 18 M. Guo, L. Fang, L. Zhang, M. Li, M. Cong, X. Guan, C. Shi, C. Gu, X. Liu, Y. Wang and X. Ding, Pulsed electrocatalysis enabling high overall nitrogen fixation performance for atomically dispersed Fe on TiO<sub>2</sub>, *Angew. Chem. Int. Ed.*, 2023, **62**, e202217635.
  - 19 J. Lan, M. Luo, J. Han, M. Peng, H. Duan and Y. Tan, Nanoporous B<sub>13</sub>C<sub>2</sub> towards highly efficient electrochemical nitrogen fixation, *Small*, 2021, **17**, 2102814.
  - 20 W. Li, Y. Ye, M. Jin, S. Zhang, C. Lin, C. Sun, Y. Zhang, G. Wang, C. Liang and H. Zhang, Ambient electrochemical nitrogen fixation with aqueous V<sub>2</sub>O<sub>5</sub> nanodots in a fluidized electrocatalysis system, *Chem. Eng. J.*, 2023, **452**, 139494.
